# Supplementary material for: Acoel Flatworms Are Not Platyhelminthes: Evidence from Phylogenomics
Source: PubMed Central journal article supplement (PMC1933604; doi:10.1371/journal.pone.0000717), 2007-08-08
Supplement: pone.0000717.s002.pdf [file pone.0000717.s002.pdf]

**Table S2. List of chimerical Operational Taxonomic Units (OTUs)**

*Convoluta*: ***Convoluta pulchra***, *Convoluta roscoffensis*  
*Hydra*: ***Hydra magnipapillata***, *Hydra vulgaris*  
*Acropora*: ***Acropora millepora***, *Acropora palmata*, *Montastraea faveolata*  
*Hydractinia*: ***Hydractinia echinata***, *Podocoryne carnea*  
*Suberites*: ***Suberites domuncula***, *Suberites fuscus*  
*Homo*: ***Homo sapiens***, *Mus musculus*, *Rattus norvegicus*, *Macaca fascicularis*, *Bos taurus*, *Canis familiaris*  
*Eptatretus*: ***Eptatretus burgeri***, *Myxine glutinosa*  
*Petromyzon*: ***Petromyzon marinus***, *Lethenteron japonicum*, *Lethenteron reissneri*  
*Branchiostoma*: ***Branchiostoma floridae***, *Branchiostoma belcheri*, *Branchiostoma lanceolatum*  
*Ciona*: ***Ciona intestinalis***, *Ciona savignyi*  
*Strongylocentrotus*: ***Strongylocentrotus purpuratus***, *Paracentrotus lividus*, *Hemicentrotus pulcherrimus*  
*Asterina*: ***Asterina pectinifera***, *Solaster stimpsonii*  
*Spadella*: ***Spadella cephaloptera***, *Flaccisagitta enflata*  
*Aplysia*: ***Aplysia californica***, *Biomphalaria glabrata*, *Lymnaea stagnalis*, *Haliotis discus*  
*Crassostrea* : ***Crassostrea virginica***, *Crassostrea gigas*, *Mytilus galloprovincialis*, *Mytilus edulis*  
*Argopecten*: ***Argopecten irradians***, *Pecten maximus*, *Chlamys farreri*  
*Schmidtea*: ***Schmidtea mediterranea***, *Dugesia ryukyuensis*, *Dugesia japonica*  
*Schistosoma*: ***Schistosoma mansoni***, *Schistosoma japonicum*  
*Echinococcus*: ***Echinococcus granulosus***, *Echinococcus multilocularis*  
*Helobdella*: ***Helobdella robusta***, *Haementeria depressa*  
*Lumbricus*: ***Lumbricus rubellus***, *Eisenia andrei*  
*Ixodes*: ***Ixodes scapularis***, *Ixodes pacificus*  
*Daphnia*: ***Daphnia pulex***, *Daphnia magna*  
*Hypsibius*: ***Hypsibius dujardini***, *Macrobotus islandicus*, *Richtersius coronifer*  
*Brugia*: ***Brugia malayi***, *Wuchereria bancrofti*, *Litomosoides sigmodontis*, *Dirofilaria immitis*, *Onchocerca volvulus*, *Ascaris suum*, *Toxocara canis*
